# Supplementary material for: Maternal and Early-Life Circadian Disruption Have Long-Lasting Negative Consequences on Offspring Development and Adult Behavior in Mice
Source: PubMed Central journal article supplement (PMC5468226; doi:10.1038/s41598-017-03406-4), 2017-06-12
Supplement: 41598_2017_3406_MOESM1_ESM.pdf [file 41598_2017_3406_MOESM1_ESM.pdf]

1 Title: **Maternal and Early-Life Circadian Disruption Have Long-Lasting Negative**  
2 **Consequences on Offspring Development and Adult Behavior in Mice**

3 Short title: **Life-Long Role for Daily Timing in Development**

4  
5 Authors:

6 Benjamin L. Smarr, Azure D. Grant, Luz Perez, Irving Zucker, & Lance J. Kriegsfeld

7  
8 **Supplemental Figures**

9

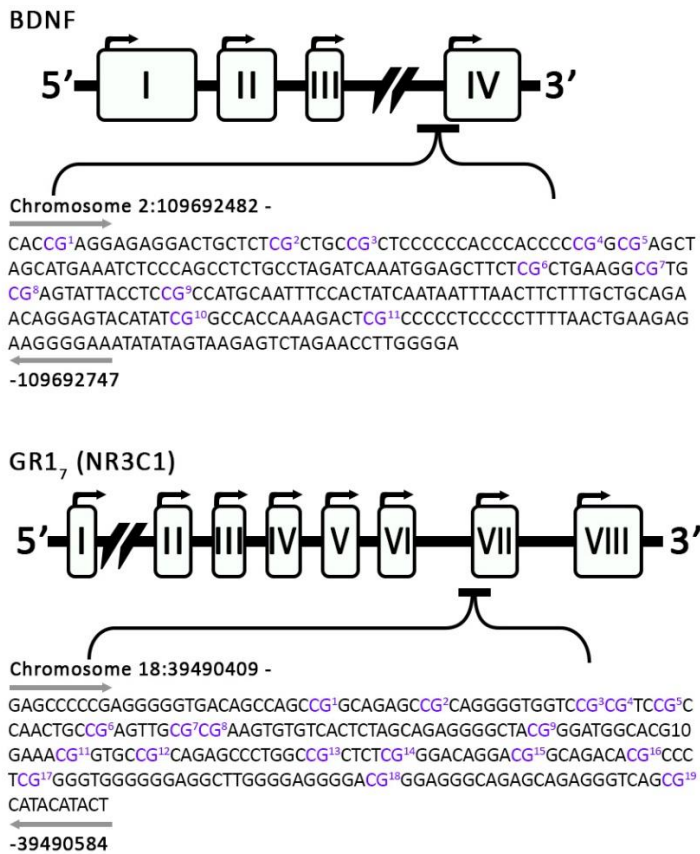

10

11 **Supplementary Figure S1. Methylation maps.** Genes are depicted with coding regions labelled

12 in roman numerals. Arrows indicate promoter regions. Amplicons are represented by black bars

13 beneath the region described in<sup>32-34</sup> as exon IV promoter region for BDNF (A). The NR3C1

14 amplicon in the promoter region of exon 1<sup>7</sup> is represented similarly<sup>29,30,45</sup>. Chromosomal location

15 according to the mouse genome assembly GRCm38.p4 (Jan 2012) is shown at the beginning and

16 end of each sequence. CpGs captured are depicted in red and are numbered sequentially.

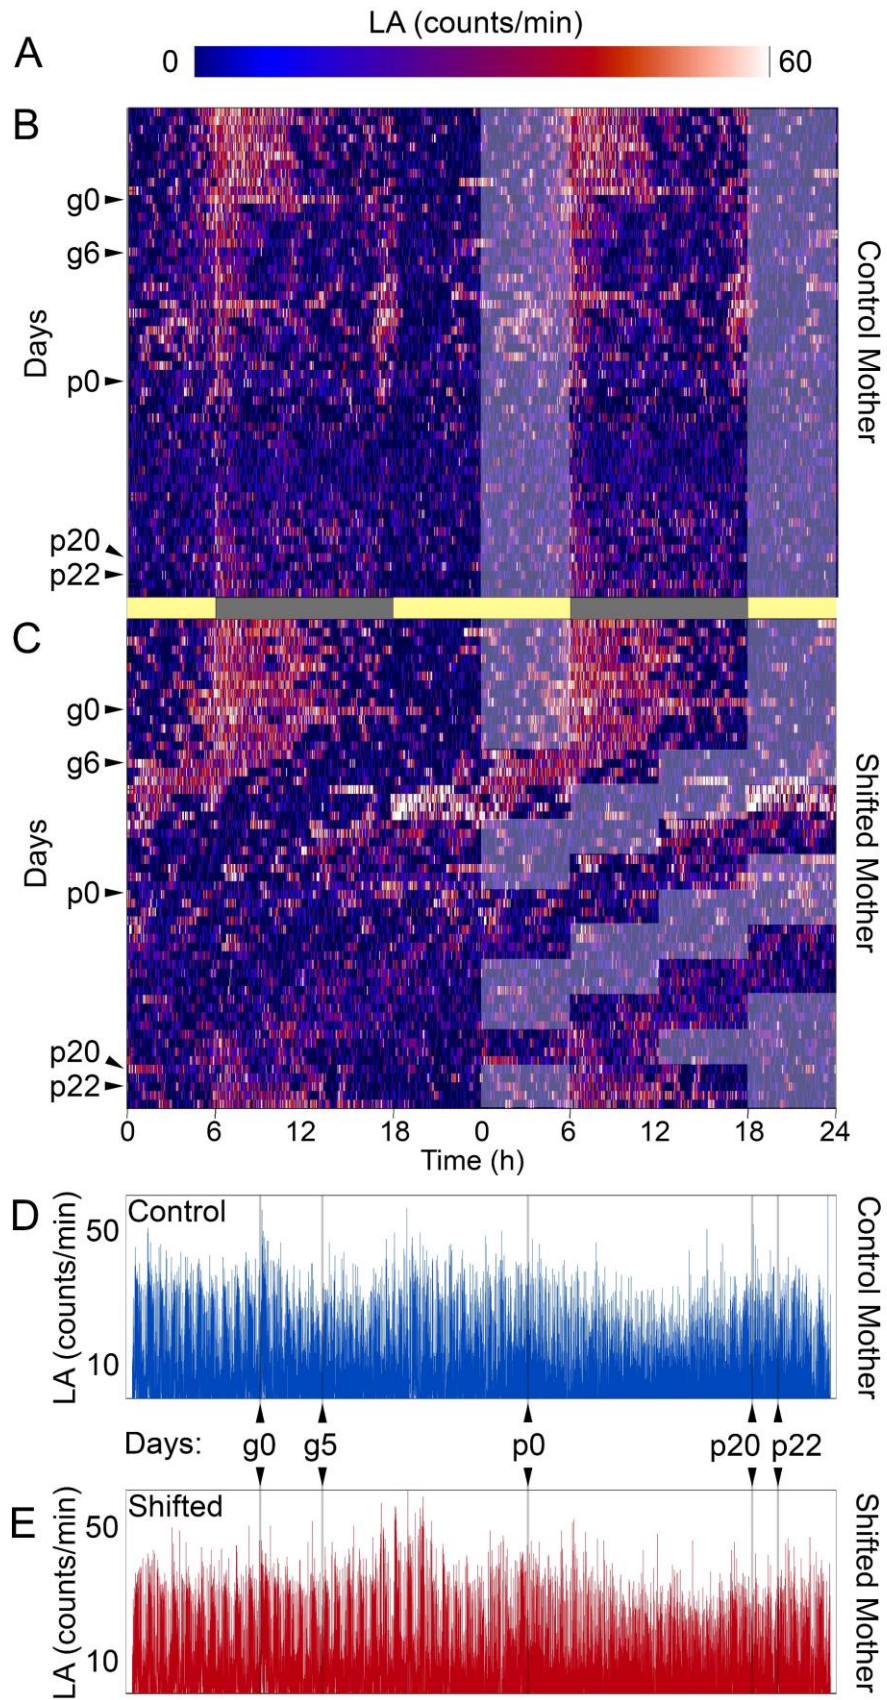

18 **Supplemental Figure S2. Maternal locomotor activity differs from CBT, but also shows**  
19 **changes due to advances in LD schedule.** Color maps of intensity (A) reveal stable daily rhythms  
20 of locomotor activity (LA) in sensor-implanted dams from control (B) and shifting (C) conditions  
21 before the onset of DCCD. Double-plotted (i.e., 48 h) actograms, with light-phase overlain on the  
22 right half. After onset of DCCD, shifting dams show expected advances in their LA rhythms in  
23 response to advances of the LD cycle, which overall give shifting dams 2 additional daily cycles  
24 during their pregnancies (48 h accumulated advance). LA reveals less stereotyped change across  
25 pregnancies (D, E) than does CBT (Fig. 2).

26
